# Supplementary material
Source: Springer Nature journal article supplement (https://www.springermedizin.de/resource/supplementary/12967_2007_216_MOESM1_ESM.pdf/9575964)

**IL-2 only**

**wt TE**

**PKO TE**

**RatIgG**

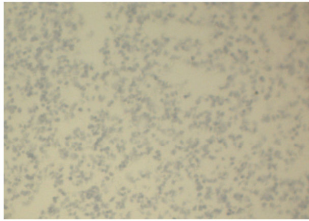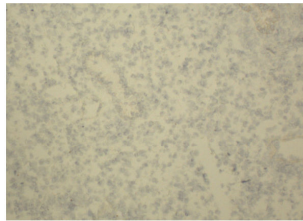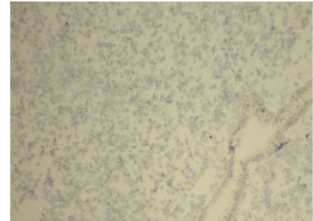

**CD4**

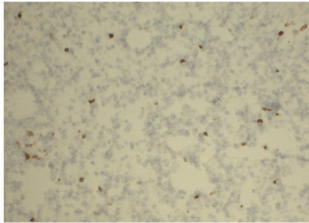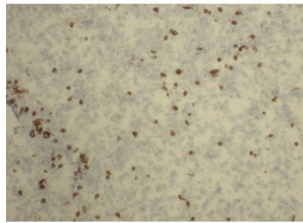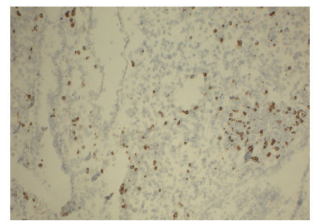

**CD8**

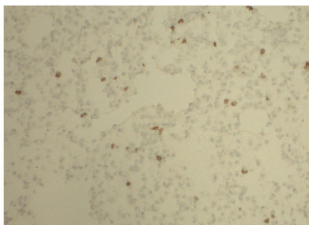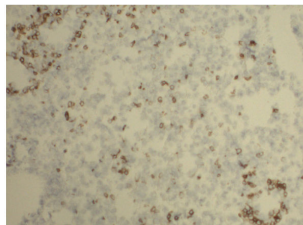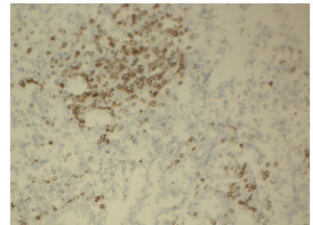

**MAC-1**

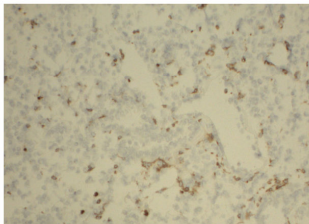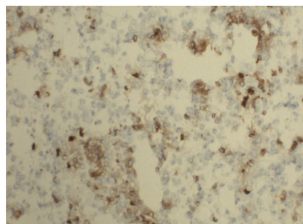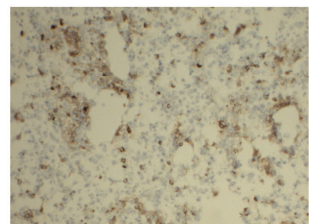

**GR-1**

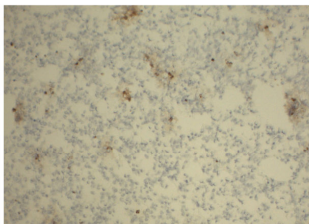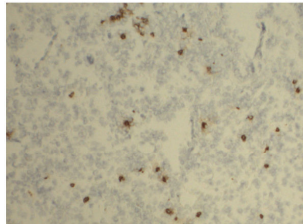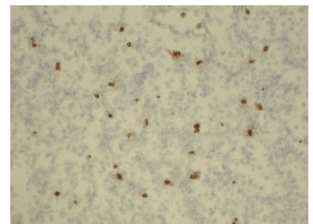

**NK1.1**

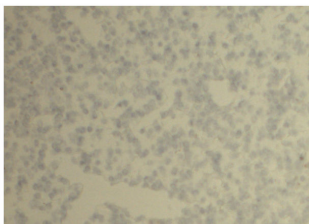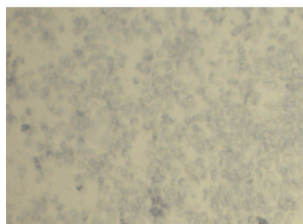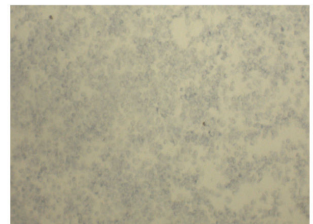

Supplement: MOESM1 [file 9575964]
